# Supplementary material for: Comparative Epidemiology of Human Fatal Infections with Novel, High (H5N6 and H5N1) and Low (H7N9 and H9N2) Pathogenicity Avian Influenza A Viruses
Source: PubMed Central journal article supplement (PMC5369099; doi:10.3390/ijerph14030263), 2017-03-04
Supplement: ijerph-14-00263-s001.pdf [file ijerph-14-00263-s001.pdf]

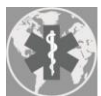

# Supplementary Material: Comparative Epidemiology of Human Fatal Infections with Novel, High (H5N6 and H5N1) and Low (H7N9 and H9N2) Pathogenicity Avian Influenza A Viruses

Zu-Qun Wu, Yi Zhang, Na Zhao, Zhao Yu, Hao Pan, Ta-Chien Chan, Zhi-Ruo Zhang and She-Lan Liu

**Table S1.** Summary of the total cases, deaths and case fatality rates (CFR) in highly pathogenic avian influenza viruses H5N1 and H5N6, and low pathogenicity avian influenza viruses H7N9 and H9N2 dates of onset from 1 January 1 1997 to 30 November, 2016.

| Avian Influenza   | Subtype           | Countries  | Province  | No. of cases | No. of deaths | CFR           |              |
|-------------------|-------------------|------------|-----------|--------------|---------------|---------------|--------------|
| HPAI              | H5N1              | Azerbaijan | -         | 8            | 5             | 62.5%         |              |
|                   | H5N1              | Bangladesh | -         | 7            | 1             | 14.3%         |              |
|                   | H5N1              | Cambodia   | -         | 38           | 29            | 76.3%         |              |
|                   | H5N1              | Canada     | -         | 1            | 1             | 100.0%        |              |
|                   | H5N1              | China      | -         | 45           | 30            | 66.7%         |              |
|                   | H5N1              | Djibouti   | -         | 1            | 0             | 0.0%          |              |
|                   | H5N1              | Egypt      | -         | 173          | 63            | 36.4%         |              |
|                   | H5N1              | Indonesia  | -         | 193          | 161           | 83.4%         |              |
|                   | H5N1              | Iraq       | -         | 3            | 2             | 66.7%         |              |
|                   | H5N1              | Laos       | -         | 2            | 2             | 100.0%        |              |
|                   | H5N1              | Burma      | -         | 1            | 0             | 0.0%          |              |
|                   | H5N1              | Nigeria    | -         | 1            | 1             | 100.0%        |              |
|                   | H5N1              | Pakistan   | -         | 3            | 1             | 33.3%         |              |
|                   | H5N1              | Thailand   | -         | 25           | 17            | 68.0%         |              |
|                   | H5N1              | Turkey     | -         | 12           | 4             | 33.3%         |              |
|                   | H5N1              | Vietnam    | -         | 125          | 62            | 49.6%         |              |
|                   | <b>H5N1 Total</b> |            |           |              | <b>638</b>    | <b>379</b>    | <b>59.4%</b> |
|                   | HPAI              | H5N6       | China     | Anhui        | 1             |               | 0.00%        |
|                   |                   | H5N6       | China     | Guangdong    | 6             | 5             | 83.33%       |
|                   |                   | H5N6       | China     | Hunan        | 4             | 2             | 50.00%       |
| H5N6              |                   | China      | Guizhou   | 1            | 1             | 100.00%       |              |
| H5N6              |                   | China      | Hubei     | 1            |               | 0.00%         |              |
| H5N6              |                   | China      | Sichuang  | 1            | 1             | 100.00%       |              |
| H5N6              |                   | China      | Yunnan    | 2            | 2             | 100.00%       |              |
| <b>H5N6 Total</b> |                   |            |           | <b>16</b>    | <b>11</b>     | <b>68.75%</b> |              |
| LPAI              | H7N9              | China      | Zhejiang  | 197          | 76            | 38.6%         |              |
|                   | H7N9              | China      | Guangdong | 184          | 69            | 37.5%         |              |

|      |                   |               |          |            |            |              |
|------|-------------------|---------------|----------|------------|------------|--------------|
|      | H7N9              | China         | Jiangsu  | 80         | 36         | 45.0%        |
|      | H7N9              | China         | Fujian   | 63         | 17         | 27.0%        |
|      | H7N9              | China         | Shanghai | 48         | 28         | 58.3%        |
|      | H7N9              | China         | Anhui    | 32         | 18         | 56.3%        |
|      | H7N9              | China         | Hunan    | 26         | 11         | 42.3%        |
|      | H7N9              | China         | Jiangxi  | 12         | 1          | 8.3%         |
|      | H7N9              | China         | Xijiang  | 10         | 9          | 90.0%        |
|      | H7N9              | China         | Shandong | 7          | 3          | 42.9%        |
|      | H7N9              | China         | Beijing  | 6          | 2          | 33.3%        |
|      | H7N9              | China         | Henan    | 4          | 1          | 25.0%        |
|      | H7N9              | China         | Guangxi  | 2          | 1          | 50.0%        |
|      | H7N9              | China         | Jilin    | 2          | 1          | 50.0%        |
|      | H7N9              | China         | Guizhou  | 1          | 1          | 100.0%       |
| LPAI | H7N9              | China         | Hebei    | 1          | 1          | 100.0%       |
|      | H7N9              | China         | Hubei    | 1          |            | 0.0%         |
|      | <b>H7N9 Total</b> |               |          | <b>676</b> | <b>275</b> | <b>40.7%</b> |
|      | H9N2              | Bangladesh    | -        | 2          | 0          | 0.0%         |
|      | H9N2              | China         | -        | 10         | 0          | 0.0%         |
|      | H9N2              | Egypt         | -        | 3          | 0          | 0.0%         |
|      | H9N2              | Hong Kong SAR | -        | 6          | 0          | 0.0%         |
|      | <b>H9N2 Total</b> |               |          | <b>21</b>  | <b>0</b>   | <b>0.0%</b>  |

---

Notes:- No available.
